# Supplementary material for: Unprecedented [Hg3Se2]2- cluster drives giant optical anisotropy and broad infrared transparency
Source: Research Square preprint supplement (doi:10.21203/rs.3.rs-6232980/v1), 2025-04-03

## checkCIF/PLATON report

Structure factors have been supplied for datablock(s) 30r5-006

THIS REPORT IS FOR GUIDANCE ONLY. IF USED AS PART OF A REVIEW PROCEDURE FOR PUBLICATION, IT SHOULD NOT REPLACE THE EXPERTISE OF AN EXPERIENCED CRYSTALLOGRAPHIC REFEREE.

No syntax errors found. CIF dictionary Interpreting this report

**Datablock: 30r5-006**

|                 |                  |                    |              |
|-----------------|------------------|--------------------|--------------|
| Bond precision: | Ga-Cl = 0.0041 A | Wavelength=0.71073 |              |
| Cell:           | a=12.3962 (8)    | b=7.1340 (5)       | c=42.127 (3) |
|                 | alpha=90         | beta=93.799 (2)    | gamma=90     |
| Temperature:    | 298 K            |                    |              |

|                | Calculated           | Reported            |
|----------------|----------------------|---------------------|
| Volume         | 3717.3 (4)           | 3717.3 (4)          |
| Space group    | C 2/c                | C 1 2/c 1           |
| Hall group     | -C 2yc               | -C 2yc              |
| Moiety formula | Hg18 Se8, 8 (Cl4 Ga) | Hg9 Se4, 4 (Cl4 Ga) |
| Sum formula    | Cl32 Ga8 Hg18 Se8    | Cl16 Ga4 Hg9 Se4    |
| Mr             | 5934.46              | 2967.23             |
| Dx, g cm-3     | 5.302                | 5.302               |
| Z              | 2                    | 4                   |
| Mu (mm-1)      | 44.924               | 44.923              |
| F000           | 5008.0               | 5008.0              |
| F000'          | 4948.09              |                     |
| h, k, lmax     | 16, 9, 54            | 16, 9, 54           |
| Nref           | 4269                 | 4250                |
| Tmin, Tmax     | 0.475, 0.638         | 0.015, 0.047        |
| Tmin'          | 0.441                |                     |

Correction method= # Reported T Limits: Tmin=0.015 Tmax=0.047  
AbsCorr = MULTI-SCAN

Data completeness= 0.996                      Theta (max)= 27.464

```
R(reflections)= 0.0463( 3692)      wR2(reflections)=
S = 1.137                        0.1213( 4250)
Npar= 150
```

---

The following ALERTS were generated. Each ALERT has the format

**test-name\_ALERT\_alert-type\_alert-level.**

Click on the hyperlinks for more details of the test.

---

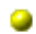

### Alert level C

|                   |                                                 |                  |        |              |
|-------------------|-------------------------------------------------|------------------|--------|--------------|
| PLAT041_ALERT_1_C | Calc. and Reported SumFormula                   | Strings          | Differ | Please Check |
|                   | Calc: Cl32 Ga8 Hg18 Se8                         |                  |        |              |
|                   | Rep.: Cl16 Ga4 Hg9 Se4                          |                  |        |              |
| PLAT042_ALERT_1_C | Calc. and Reported MoietyFormula                | Strings          | Differ | Please Check |
|                   | Calc: Hg18 Se8, 8(Cl4 Ga)                       |                  |        |              |
|                   | Rep.: Hg9 Se4, 4(Cl4 Ga)                        |                  |        |              |
| PLAT244_ALERT_4_C | Low 'Solvent' Ueq as Compared to Neighbors of   |                  |        | Ga1 Check    |
| PLAT244_ALERT_4_C | Low 'Solvent' Ueq as Compared to Neighbors of   |                  |        | Ga2 Check    |
| PLAT906_ALERT_3_C | Large K Value in the Analysis of Variance ..... |                  |        | 4.859 Check  |
| PLAT911_ALERT_3_C | Missing FCF Refl Between Thmin & STh/L=         | 0.600            |        | 8 Report     |
|                   | 1 1 1, -2 0 2, -4 0 4, -4 0 6, 6 0 30,          |                  |        | 3 1 31,      |
|                   | -2 2 34, 0 0 36,                                |                  |        |              |
| PLAT971_ALERT_2_C | Check Calcd Resid. Dens.                        | 1.72Ang From Se2 |        | 1.69 eA-3    |
| PLAT971_ALERT_2_C | Check Calcd Resid. Dens.                        | 0.80Ang From Hg4 |        | 1.51 eA-3    |
| PLAT974_ALERT_2_C | Check Calcd Negative Resid. Density on          | Hg5              |        | -1.28 eA-3   |

---

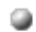

### Alert level G

|                   |                                                            |       |  |              |
|-------------------|------------------------------------------------------------|-------|--|--------------|
| PLAT004_ALERT_5_G | Polymeric Structure Found with Maximum Dimension           |       |  | 1 Info       |
| PLAT045_ALERT_1_G | Calculated and Reported Z Differ by a Factor ...           |       |  | 0.500 Check  |
| PLAT083_ALERT_2_G | SHELXL Second Parameter in WGHT Unusually Large            |       |  | 151.49 Why ? |
| PLAT794_ALERT_5_G | Tentative Bond Valency for Hg5 (II)                        | .     |  | 1.66 Info    |
| PLAT794_ALERT_5_G | Tentative Bond Valency for Ga1 (III)                       | .     |  | 3.07 Info    |
| PLAT794_ALERT_5_G | Tentative Bond Valency for Ga2 (III)                       | .     |  | 3.06 Info    |
| PLAT910_ALERT_3_G | Missing # of FCF Reflection(s) Below Theta(Min).           |       |  | 2 Note       |
|                   | 0 0 2, 0 0 4,                                              |       |  |              |
| PLAT912_ALERT_4_G | Missing # of FCF Reflections Above STh/L=                  | 0.600 |  | 9 Note       |
| PLAT933_ALERT_2_G | Number of HKL-OMIT Records in Embedded .res File           |       |  | 5 Note       |
|                   | -2 2 34, 0 0 4, 0 0 36, 3 1 31, 6 0 30,                    |       |  |              |
| PLAT969_ALERT_5_G | The 'Henn et al.' R-Factor-gap value .....                 |       |  | 2.856 Note   |
|                   | Predicted wR2: Based on SigI**2 4.25 or SHELX Weight 10.67 |       |  |              |

---

- 0 **ALERT level A** = Most likely a serious problem - resolve or explain  
0 **ALERT level B** = A potentially serious problem, consider carefully  
9 **ALERT level C** = Check. Ensure it is not caused by an omission or oversight  
10 **ALERT level G** = General information/check it is not something unexpected
- 3 ALERT type 1 CIF construction/syntax error, inconsistent or missing data  
5 ALERT type 2 Indicator that the structure model may be wrong or deficient  
3 ALERT type 3 Indicator that the structure quality may be low  
3 ALERT type 4 Improvement, methodology, query or suggestion  
5 ALERT type 5 Informative message, check
-

It is advisable to attempt to resolve as many as possible of the alerts in all categories. Often the minor alerts point to easily fixed oversights, errors and omissions in your CIF or refinement strategy, so attention to these fine details can be worthwhile. In order to resolve some of the more serious problems it may be necessary to carry out additional measurements or structure refinements. However, the purpose of your study may justify the reported deviations and the more serious of these should normally be commented upon in the discussion or experimental section of a paper or in the "special\_details" fields of the CIF. checkCIF was carefully designed to identify outliers and unusual parameters, but every test has its limitations and alerts that are not important in a particular case may appear. Conversely, the absence of alerts does not guarantee there are no aspects of the results needing attention. It is up to the individual to critically assess their own results and, if necessary, seek expert advice.

### **Publication of your CIF in IUCr journals**

A basic structural check has been run on your CIF. These basic checks will be run on all CIFs submitted for publication in IUCr journals (*Acta Crystallographica*, *Journal of Applied Crystallography*, *Journal of Synchrotron Radiation*); however, if you intend to submit to *Acta Crystallographica Section C* or *E* or *IUCrData*, you should make sure that full publication checks are run on the final version of your CIF prior to submission.

### **Publication of your CIF in other journals**

Please refer to the *Notes for Authors* of the relevant journal for any special instructions relating to CIF submission.

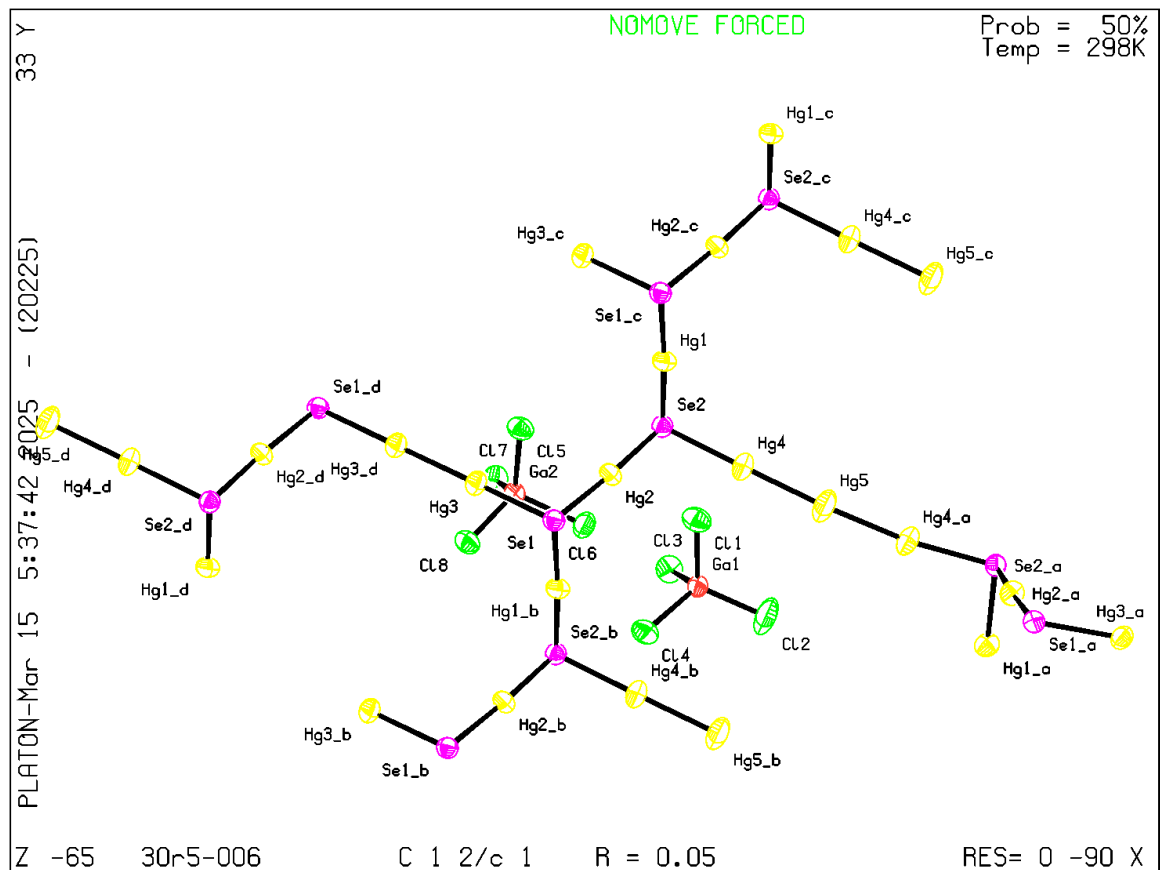

Supplement: Supplementary file 1 [file b5c23a276c8c26e81ae0f38a.pdf]
