# Supplementary material for: Unprecedented [Hg3Se2]2- cluster drives giant optical anisotropy and broad infrared transparency
Source: Research Square preprint supplement (doi:10.21203/rs.3.rs-6232980/v1), 2025-04-03
Supplement: Supplementary file 1 [file aac4cfa724c298e78c965c6f.docx]

**Supporting Information**

**Unprecedented [Hg3Se2]2- cluster drives giant optical anisotropy and broad infrared transparency**

**Qixian Ren1,2, Chen Cui1,2, Xinchen Chen1,2, Yabo Wu1*, Ran An1, Zhihua Yang1, Shilie Pan1***

1Research Center for Crystal Materials, CAS Key Laboratory of Functional Materials and Devices for Special Environments, Xinjiang Technical Institute of Physics & Chemistry, CAS, Xinjiang Key Laboratory of Functional Crystal Materials, 40-1 South Beijing Road, Urumqi 830011, China. 2These authors contributed equally: Qixian Ren, Cui Chen, Xinchen Chen.

*e-mails: wyb@ms.xjb.ac.cn; slpan@ms.xjb.ac.cn

**Supplementary Table 1.** Crystal data and structure refinement for Hg9Ga4Se4Cl16 (298 K).

| Empirical formula | Hg9Ga4Se4Cl16 |
| --- | --- |
| Formula weight (Da) | 2967.23 |
| Temperature (K) | 298.00 |
| Crystal system | Monoclinic |
| Space group | *C*2/*c* |
| *a* (Å) | 12.3962(8) |
| *b* (Å) | 7.1340(5) |
| *c* (Å) | 42.127(3) |
| *α* (°) | 90 |
| *β* (°) | 93.799(2) |
| *γ* (°) | 90 |
| Volume (Å3) | 3717.3(4) |
| *Z* | 4 |
| Density (calc.) (g/cm3) | 5.302 |
| Absorption coefficient (mm‑1) | 44.923 |
| *F* (000) | 5008.0 |
| Completeness to *θ* (%) | 99.7 |
| Radiation | MoKα (λ = 0.71073) |
| Thetarange for data collection | 5.816 to 54.928 |
| Index ranges | -14 ≤ *h* ≤ 16, -9 ≤ *k* ≤ 9, -54 ≤ *l* ≤ 54 |
| Reflections collected | 34982 |
| Independent reflections | 4250 [*Rint* = 0.0605, *Rsigma* = 0.0386] |
| Data / restraints / parameters | 4250 / 0 / 150 |
| Goodness-of-fit on *F*2 | 1.095 |
| Final R indexes [I ≥ 2*σ* (*I*)] *a* | *R*1 = 0.0462, *wR*2 = 0.1114 |
| Final R indexes [all data] *a* | *R*1 = 0.0534, *wR*2 = 0.1149 |
| Largest diff. peak / hole (e/Å-3) | 1.17 / -1.25 |

*a* *R*1 = Σ||*F*o| - |*F*c||/Σ|*F*o| and *wR*2 = [Σ*w* (*F*o2 – *F*c2)2 / Σ*w* *F*o4]1/2 for *F*o2 > 2*σ*( *F*o2)

**Supplementary Table 2.** Fractional atomic coordinates (×104) and equivalent isotropic displacement parameters (Å2×103) for Hg9Ga4Se4Cl16 (298 K). Ueq is defined as 1/3 of the trace of the orthogonalized UIJ tensor.

| **Atom** | **X** | **y** | **z** | **U(eq)** |
| --- | --- | --- | --- | --- |
| Hg1 | 6325.1(5) | 3143.2(9) | 6103.5(2) | 45.56(16) |
| Hg2 | 3822.2(5) | 5631.8(9) | 6098.7(2) | 45.25(16) |
| Hg3 | 2666.4(5) | 7774.6(8) | 5299.4(2) | 45.51(16) |
| Hg4 | 4823.9(6) | 3210.3(11) | 6888.1(2) | 59.7(2) |
| Hg5 | 5000 | 3381.0(19) | 7500 | 77.8(4) |
| Ga1 | 3170.7(13) | 8067(2) | 6954.0(4) | 38.1(3) |
| Ga2 | 1198.1(12) | 3140(2) | 5565.9(3) | 33.9(3) |
| Se1 | 3103.0(11) | 8638(2) | 5883.7(3) | 38.6(3) |
| Se2 | 4509.9(11) | 2567.4(19) | 6279.4(3) | 38.3(3) |
| Cl1 | 4752(3) | 8046(6) | 6756.2(12) | 60.1(11) |
| Cl2 | 3274(6) | 7903(10) | 7458.5(11) | 95.4(19) |
| Cl3 | 2313(3) | 5657(5) | 6732.2(10) | 52.8(9) |
| Cl4 | 2287(3) | 10490(6) | 6762.1(11) | 56.3(10) |
| Cl5 | 2836(3) | 3152(6) | 5415.5(10) | 50.4(9) |
| Cl6 | 1300(3) | 3055(6) | 6084.5(9) | 53.2(9) |
| Cl7 | 333(3) | 639(5) | 5406.6(10) | 52.4(9) |
| Cl8 | 343(3) | 5666(5) | 5416.7(10) | 49.4(9) |

**Supplementary Table 3.** Anisotropic displacement parameters (Å2 × 103) for Hg9Ga4Se4Cl16 (298 K). The anisotropic displacement factor exponent takes the form: -2π2[h2a*2U11+2hka*b*U12+…].

| **Atom** | **U11** | **U22** | **U33** | **U23** | **U13** | **U12** |
| --- | --- | --- | --- | --- | --- | --- |
| Hg1 | 39.5(3) | 50.6(3) | 47.4(3) | 1.4(2) | 8.7(2) | 9.1(2) |
| Hg2 | 39.5(3) | 49.7(3) | 46.3(3) | 6.2(2) | 0.7(2) | 11.0(2) |
| Hg3 | 53.1(4) | 49.0(3) | 34.7(3) | 4.5(2) | 4.2(2) | -0.8(3) |
| Hg4 | 72.4(5) | 74.2(5) | 32.3(3) | 3.8(3) | 3.3(3) | 5.8(4) |
| Hg5 | 101.3(9) | 98.6(9) | 33.2(5) | 0 | 3.8(5) | 0 |
| Ga1 | 40.4(8) | 40.0(8) | 33.7(7) | -0.9(6) | 0.6(6) | 0.7(6) |
| Ga2 | 32.9(7) | 31.2(7) | 37.3(8) | 0.0(6) | 1.1(6) | -1.4(6) |
| Se1 | 37.7(7) | 38.3(7) | 39.7(7) | -1.7(6) | 1.9(6) | 1.7(6) |
| Se2 | 40.5(7) | 38.0(7) | 36.1(7) | -0.9(5) | 0.9(6) | -0.2(6) |
| Cl1 | 41(2) | 64(3) | 76(3) | 3(2) | 8.3(19) | 1.5(18) |
| Cl2 | 137(5) | 115(5) | 33(2) | 0(3) | -1(3) | 1(4) |
| Cl3 | 53(2) | 43.9(19) | 61(2) | -4.9(17) | -2.0(18) | -11.2(17) |
| Cl4 | 58(2) | 45(2) | 66(3) | 2.1(18) | 2.4(19) | 11.7(18) |
| Cl5 | 36.9(18) | 53(2) | 62(2) | 8.1(18) | 9.8(17) | 1.2(16) |
| Cl6 | 60(2) | 64(2) | 34.8(18) | -1.6(16) | 2.5(17) | -0.5(19) |
| Cl7 | 59(2) | 42.2(19) | 55(2) | -7.9(16) | -2.7(18) | -12.9(17) |
| Cl8 | 48(2) | 41.6(19) | 58(2) | 6.5(16) | 2.3(17) | 8.6(16) |

**Supplementary Table 4.** Bond lengths for Hg9Ga4Se4Cl16 (298 K).

| **Atom** | **Atom** | **Length/Å** |  | **Atom** | **Atom** | **Length/Å** |
| --- | --- | --- | --- | --- | --- | --- |
| Hg1 | Se11 | 2.4718(15) |  | Ga1 | Cl1 | 2.180(4) |
| Hg1 | Se2 | 2.4498(15) |  | Ga1 | Cl2 | 2.124(5) |
| Hg2 | Se1 | 2.4716(15) |  | Ga1 | Cl3 | 2.198(4) |
| Hg2 | Se2 | 2.4493(15) |  | Ga1 | Cl4 | 2.173(4) |
| Hg3 | Hg32 | 2.5595(11) |  | Ga2 | Cl5 | 2.167(4) |
| Hg3 | Se1 | 2.5600(15) |  | Ga2 | Cl6 | 2.181(4) |
| Hg4 | Hg5 | 2.5755(6) |  | Ga2 | Cl7 | 2.165(4) |
| Hg4 | Se2 | 2.6087(15) |  | Ga2 | Cl8 | 2.163(4) |

11/2+X,-1/2+Y,+Z; 21/2-X,3/2-Y,1-Z

**Supplementary Table 5.** Bond angles for Hg9Ga4Se4Cl16 (298 K).

| **Atom** | **Atom** | **Atom** | **Angle/˚** |  | **Atom** | **Atom** | **Atom** | **Angle/˚** |
| --- | --- | --- | --- | --- | --- | --- | --- | --- |
| Se2 | Hg1 | Se11 | 175.45(5) |  | Cl7 | Ga2 | Cl5 | 111.54(17) |
| Se2 | Hg2 | Se1 | 176.46(5) |  | Cl7 | Ga2 | Cl6 | 106.40(17) |
| Se1 | Hg3 | Hg32 | 174.01(5) |  | Cl8 | Ga2 | Cl5 | 111.26(16) |
| Hg5 | Hg4 | Se2 | 171.66(5) |  | Cl8 | Ga2 | Cl6 | 107.99(17) |
| Hg4 | Hg5 | Hg43 | 174.58(7) |  | Cl8 | Ga2 | Cl7 | 111.92(17) |
| Cl1 | Ga1 | Cl3 | 104.72(18) |  | Hg14 | Se1 | Hg3 | 100.89(5) |
| Cl2 | Ga1 | Cl1 | 112.7(3) |  | Hg2 | Se1 | Hg14 | 92.73(5) |
| Cl2 | Ga1 | Cl3 | 112.2(2) |  | Hg2 | Se1 | Hg3 | 101.06(5) |
| Cl2 | Ga1 | Cl4 | 114.3(2) |  | Hg1 | Se2 | Hg2 | 93.68(5) |
| Cl4 | Ga1 | Cl1 | 107.90(18) |  | Hg1 | Se2 | Hg4 | 100.81(5) |
| Cl4 | Ga1 | Cl3 | 104.26(17) |  | Hg2 | Se2 | Hg4 | 100.06(5) |
| Cl5 | Ga2 | Cl6 | 107.46(17) |  |  |  |  |  |

11/2+X,-1/2+Y,+Z; 21/2-X,3/2-Y,1-Z; 31-X,+Y,3/2-Z; 4-1/2+X,1/2+Y,+Z

**Supplementary Figure 1.** PXRD patterns of HGSC.


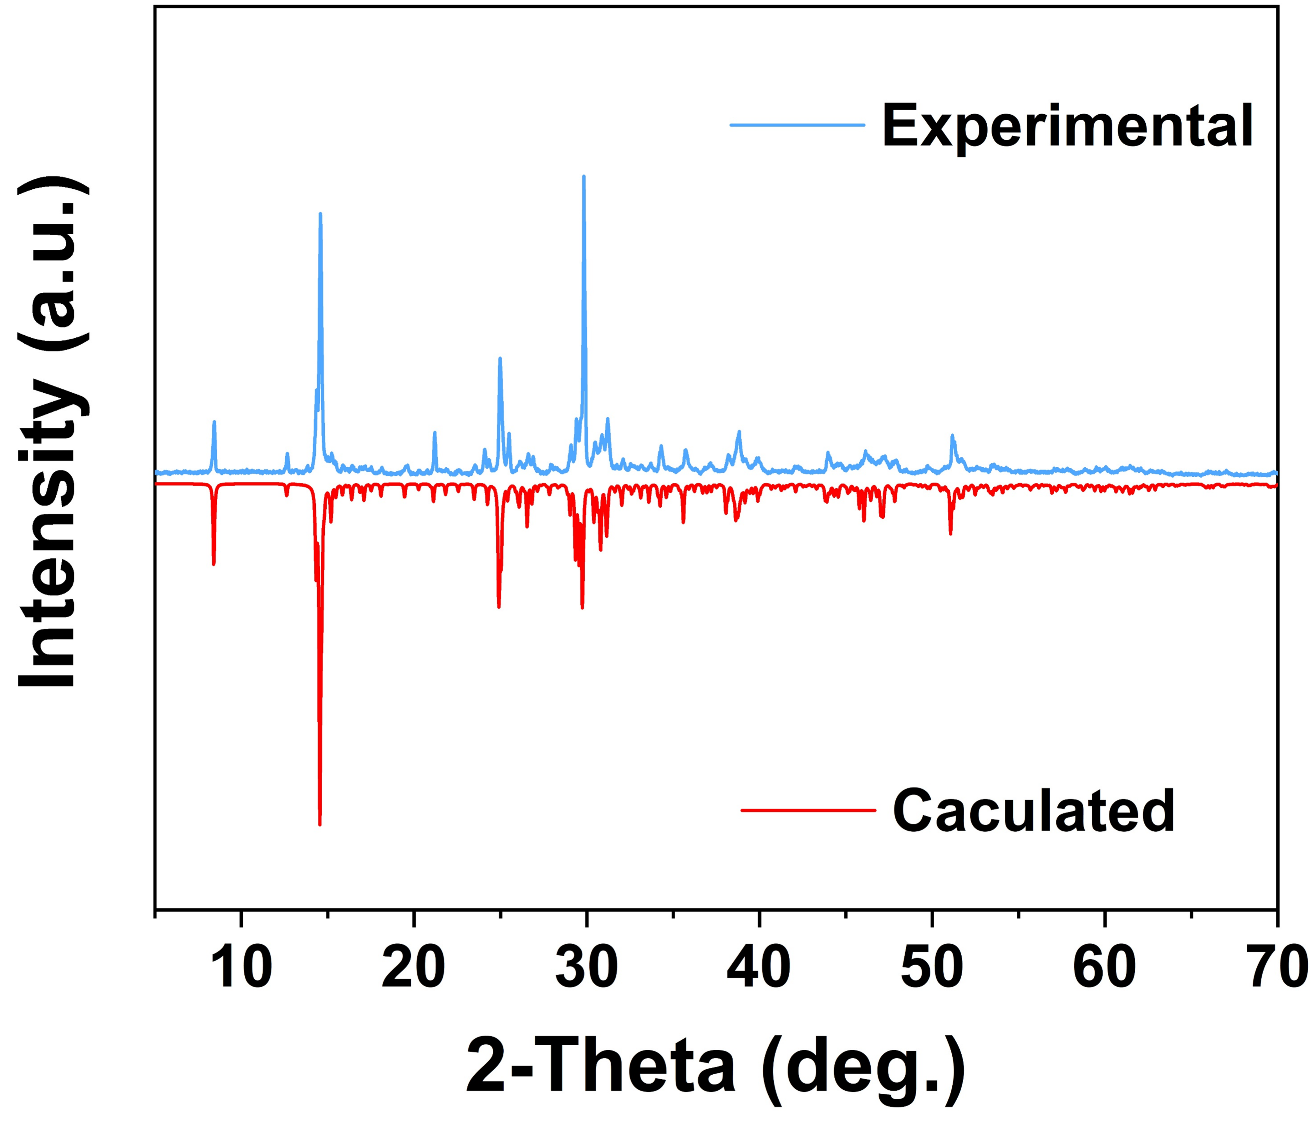


**Supplementary Figure 2.** The X-ray photoelectron spectra of HGSC: (a) survey spectrum, (b) gallium, (c) selenium, and (d) chlorine.


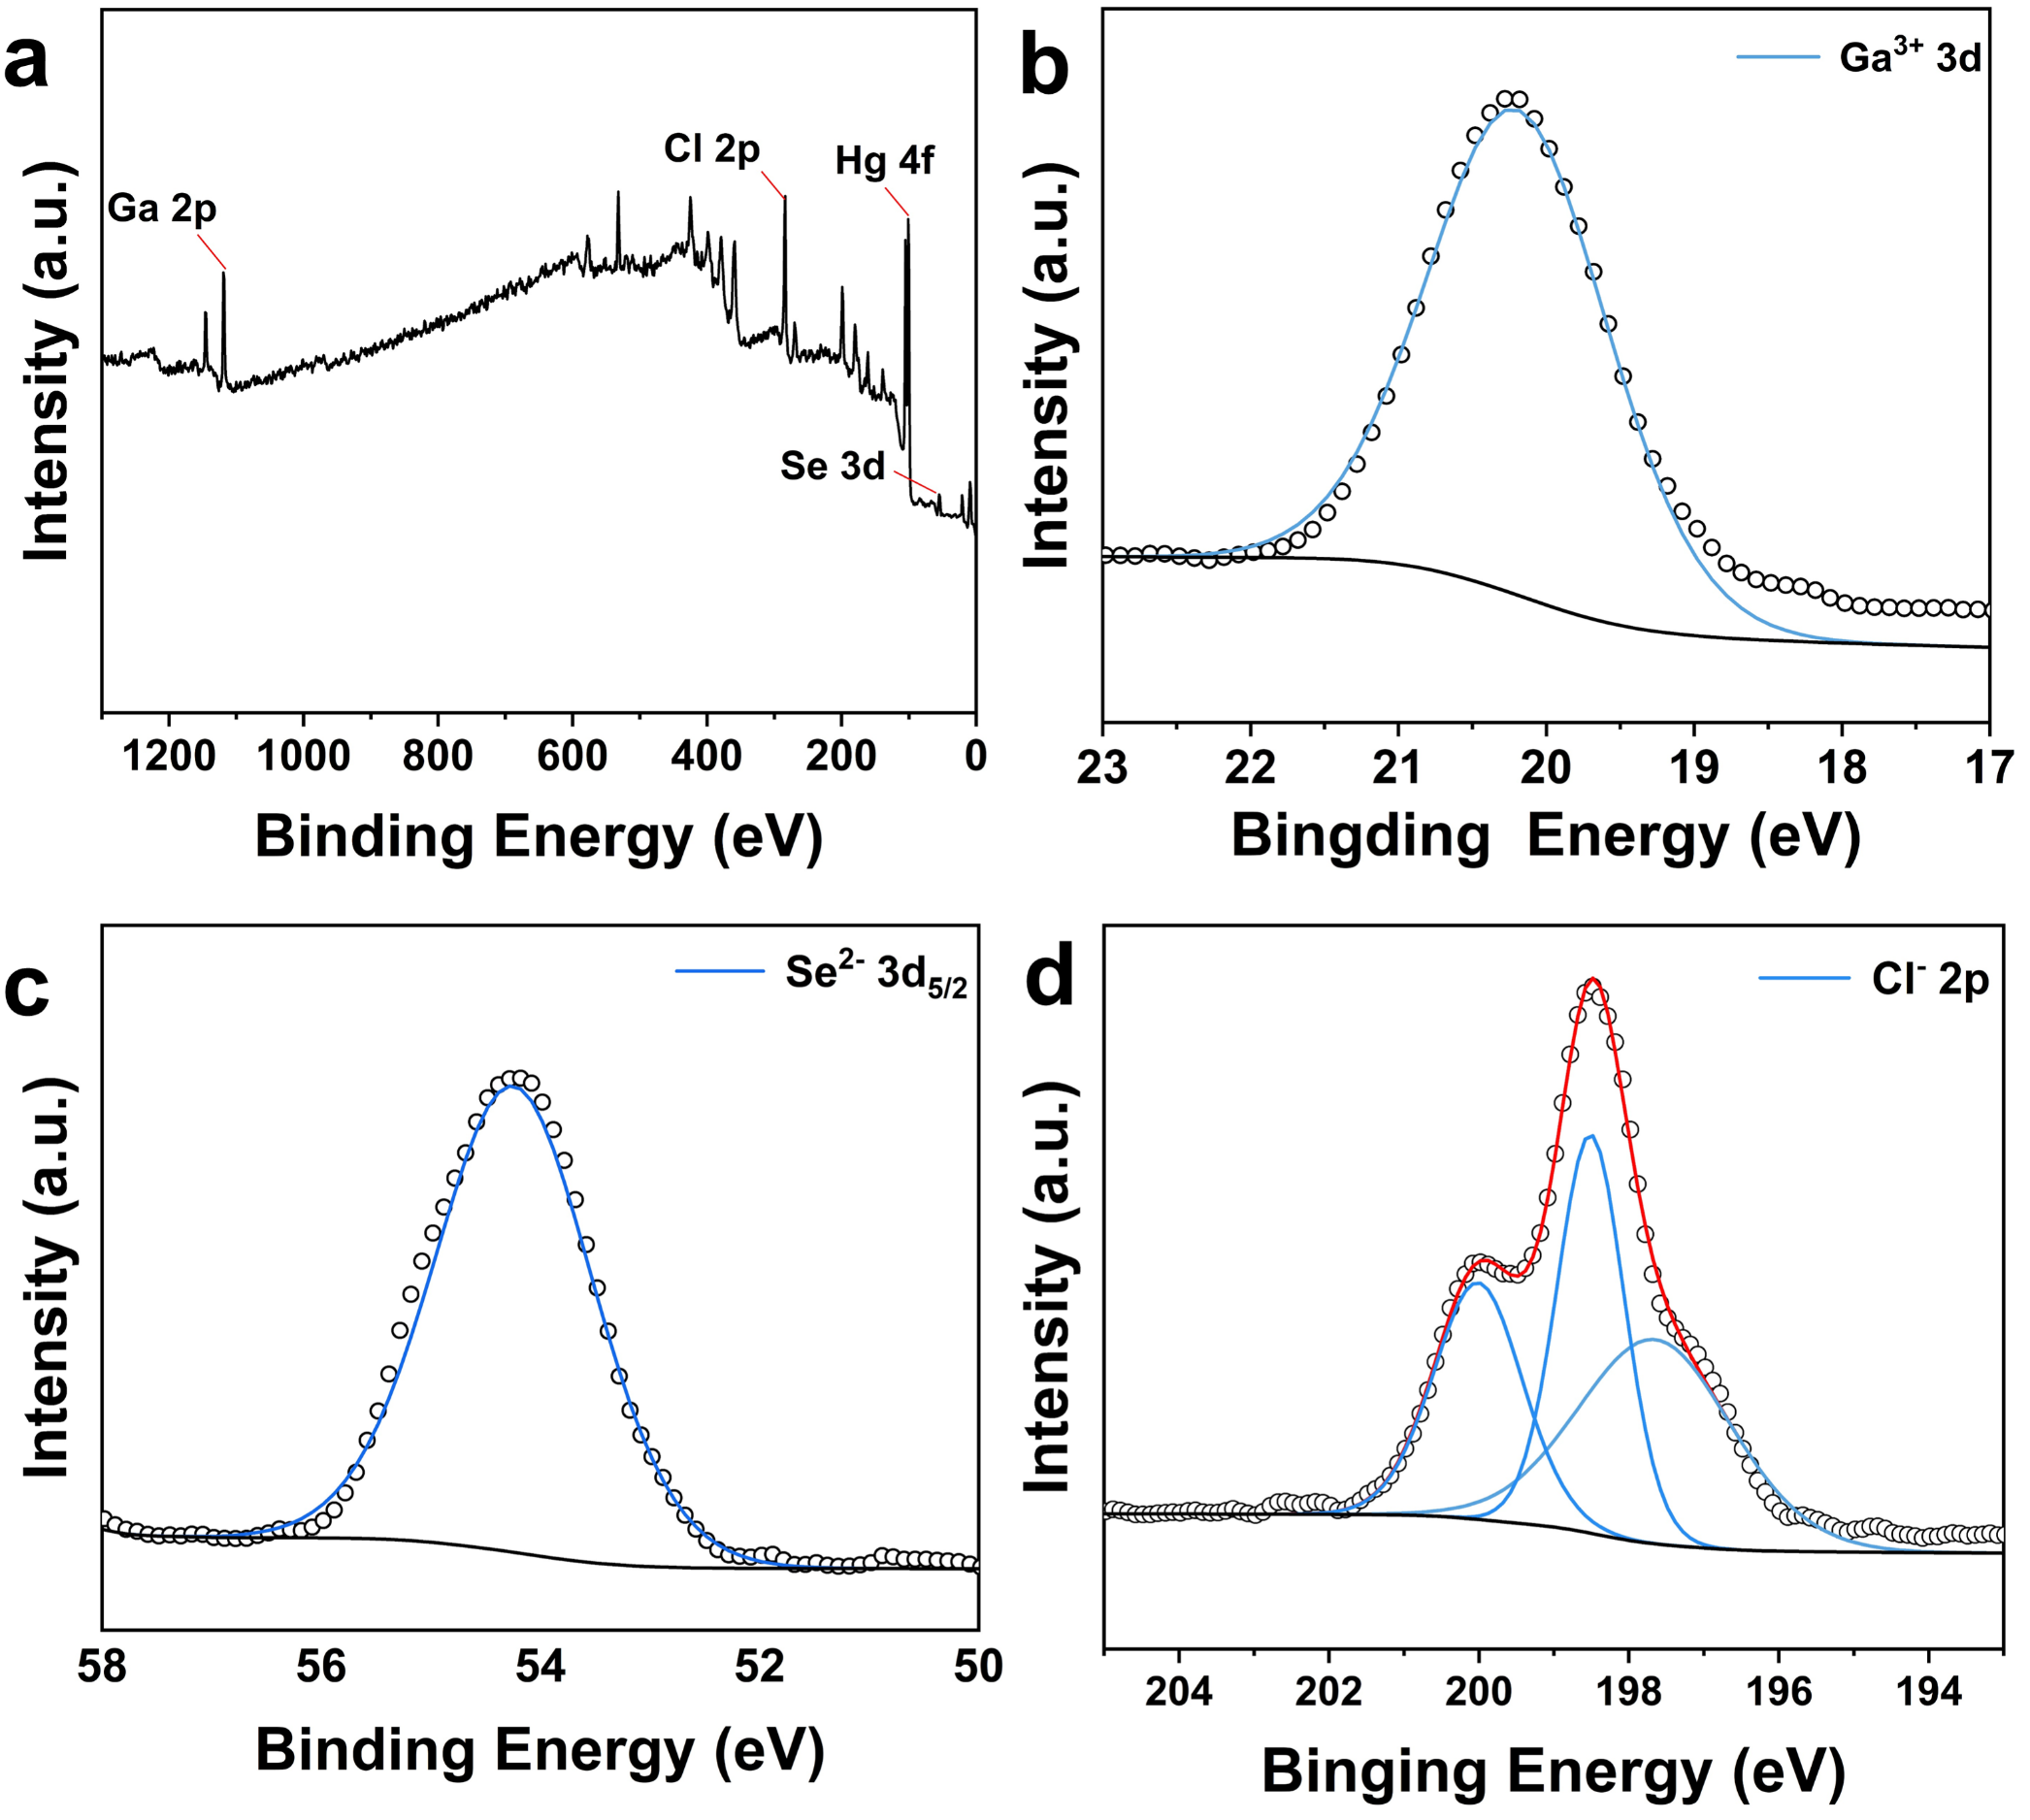


**Supplementary Figure 3.** Photoluminescence spectrum of HGSC.


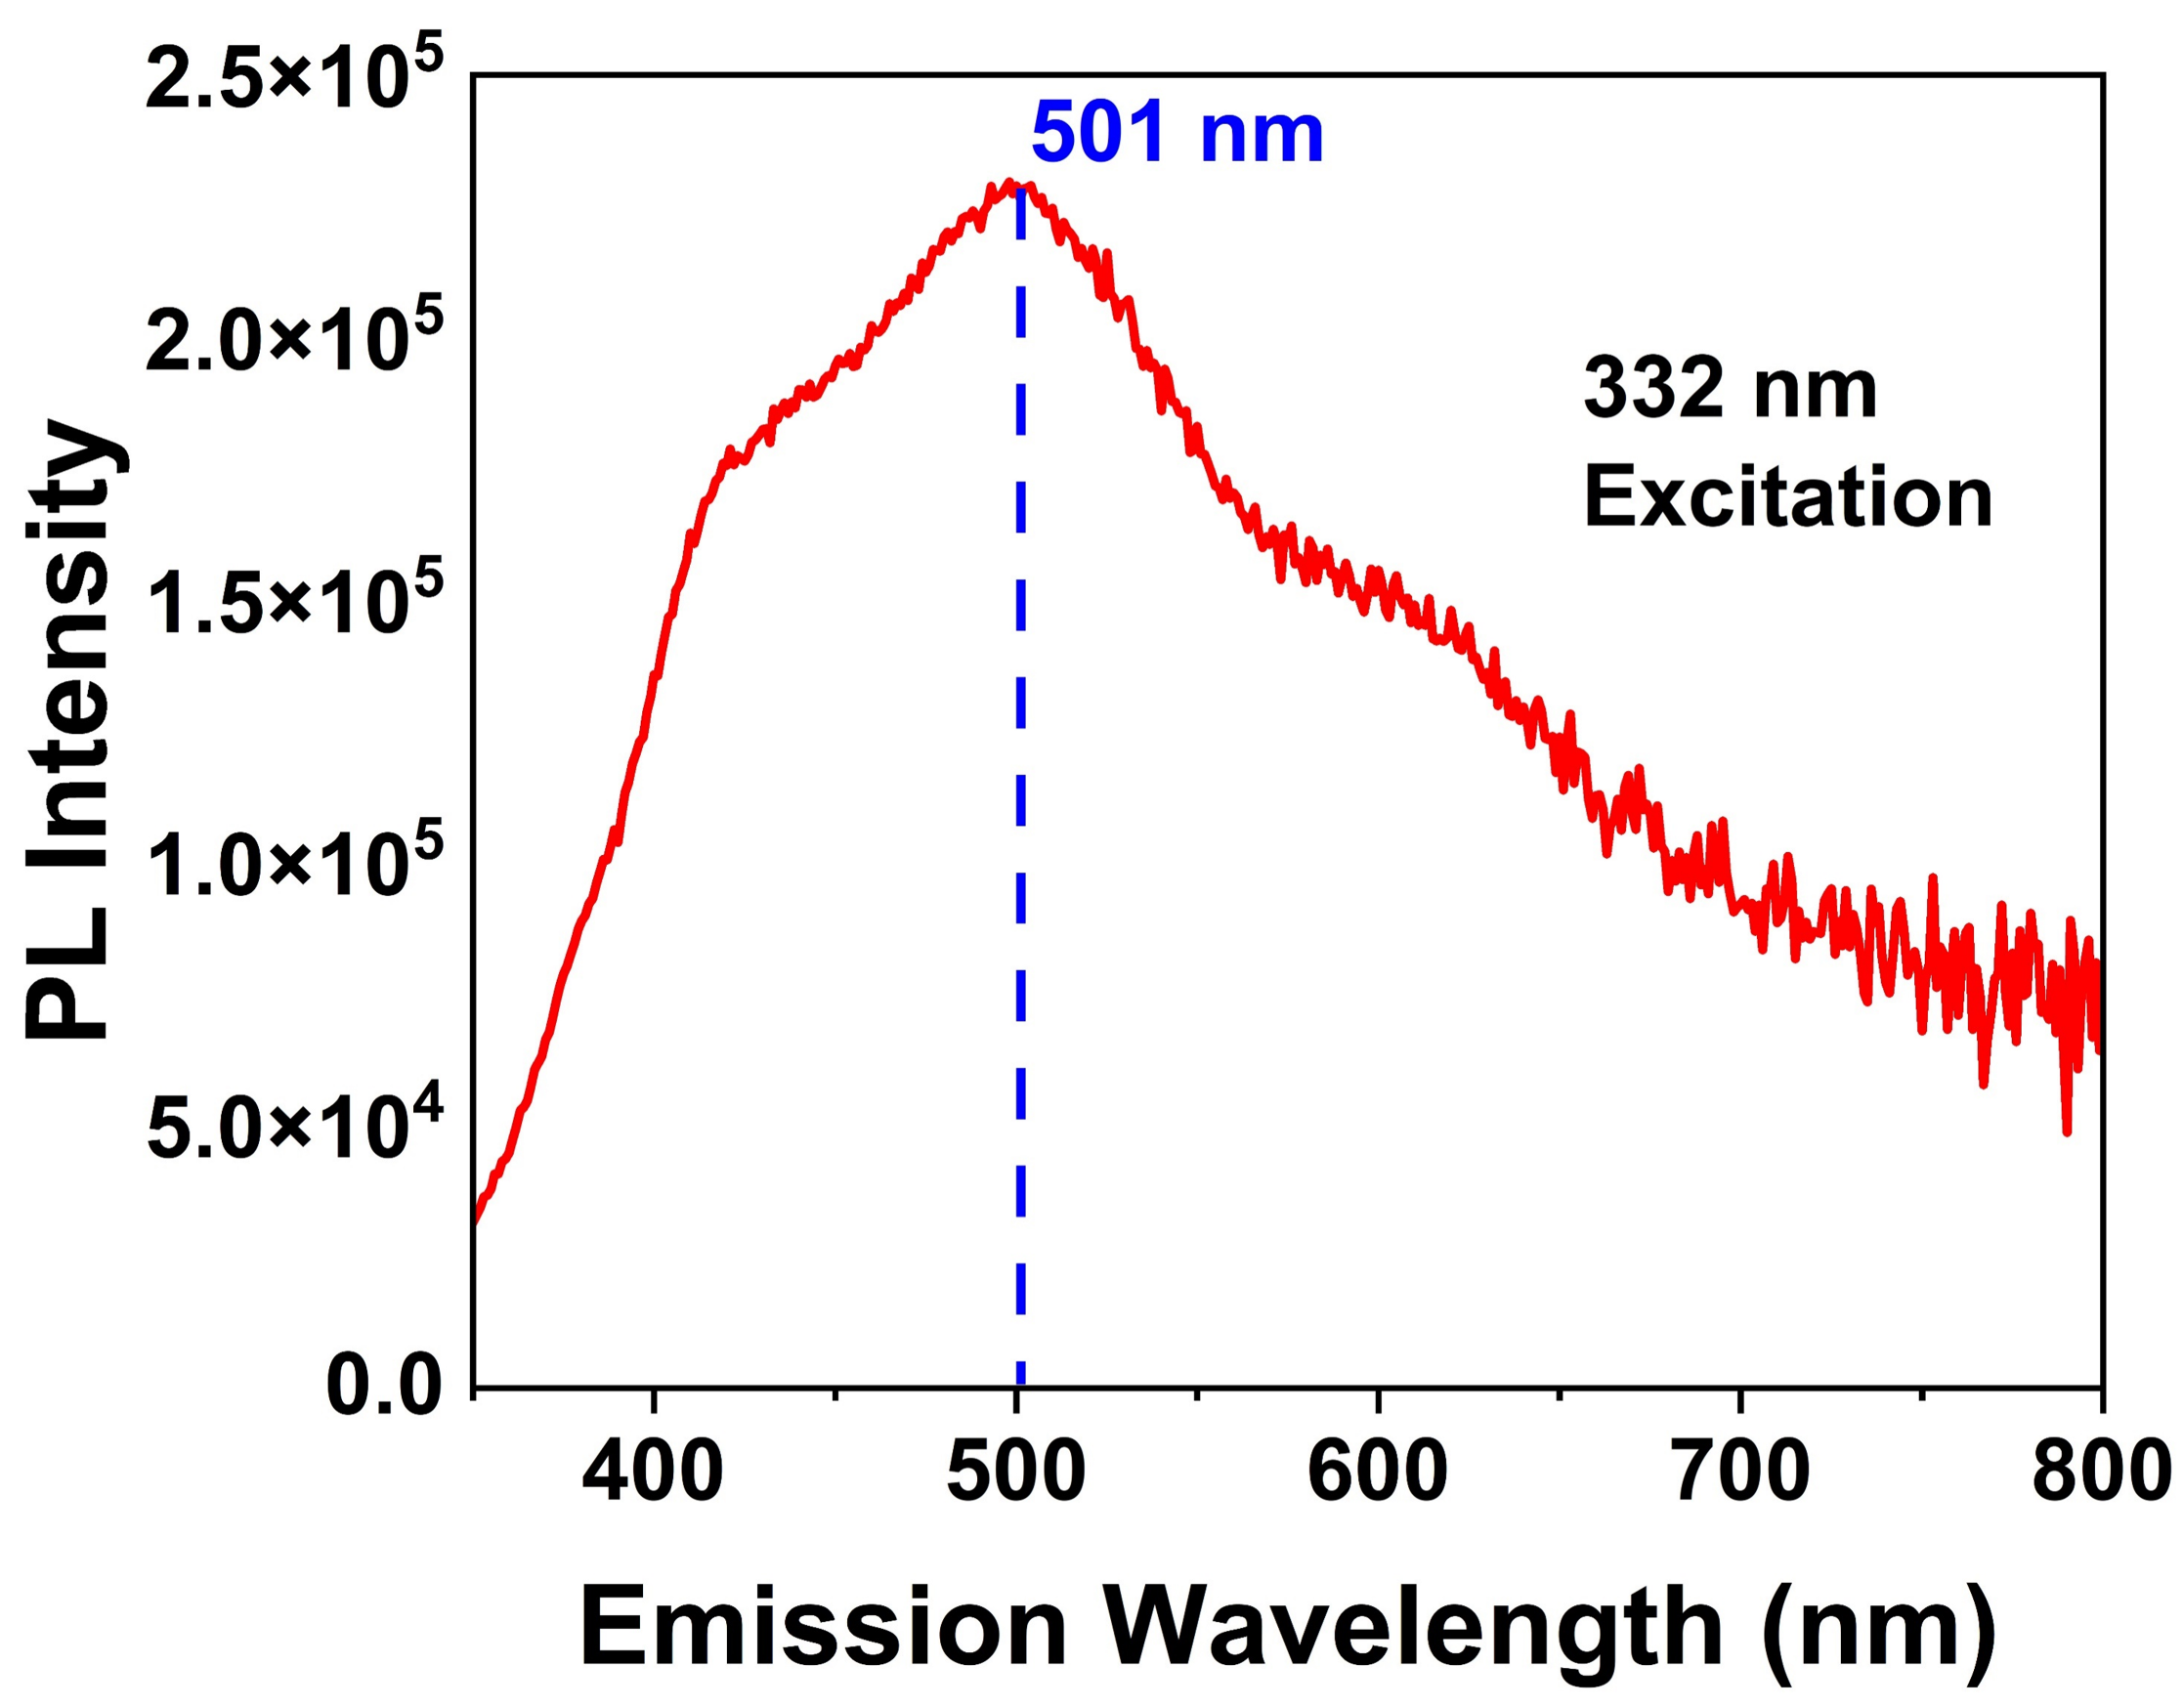


**Supplementary Figure 4.** Pristine single crystal, crystal morphology change variation of HGSC under different laser output energies.


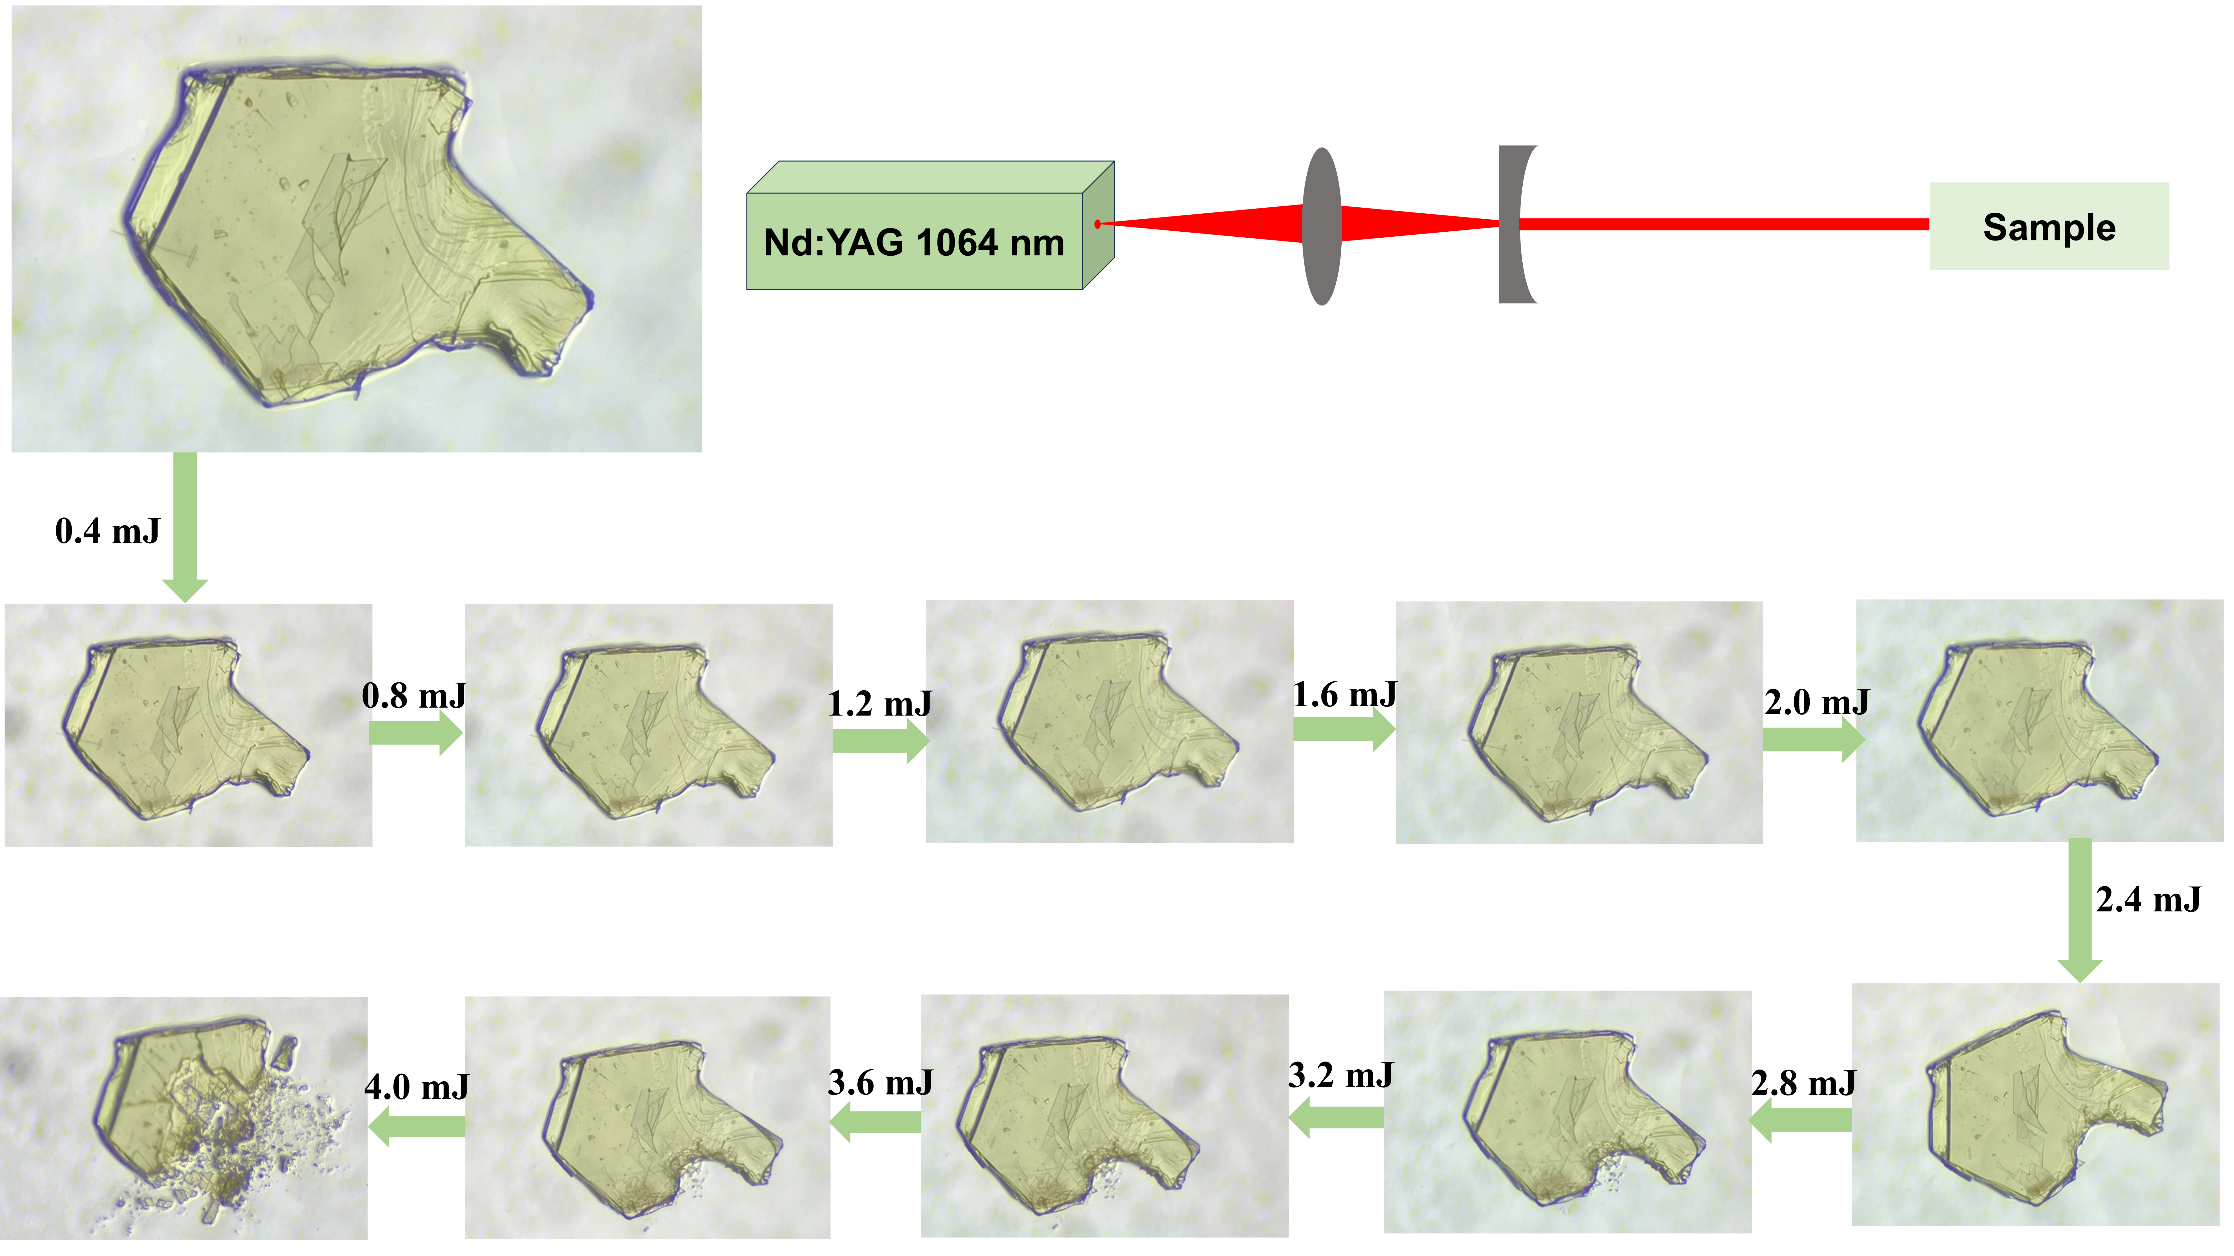


**Supplementary Figure 5.** The electron localization function for HGSC.


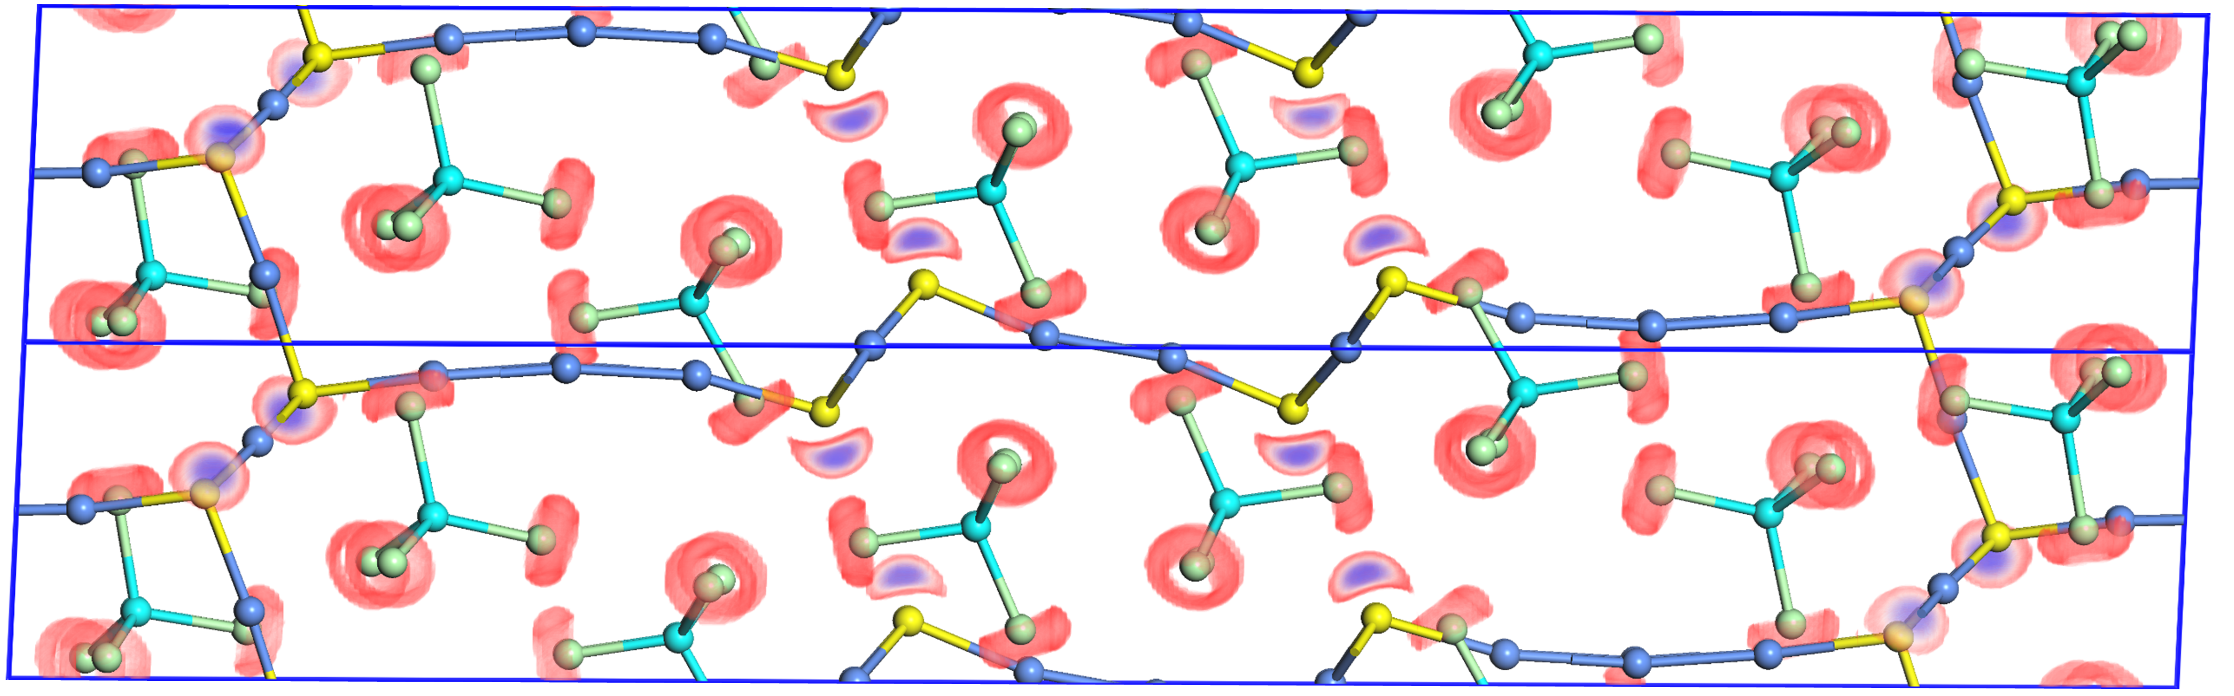


**Birefringence measurement of HGSC.**

Numerical fitting of the ellipticity tanχ (defined as the ratio of the short axis to the long axis) and *ψ* (representing the angle between the long axis of the ellipse and the x-axis).


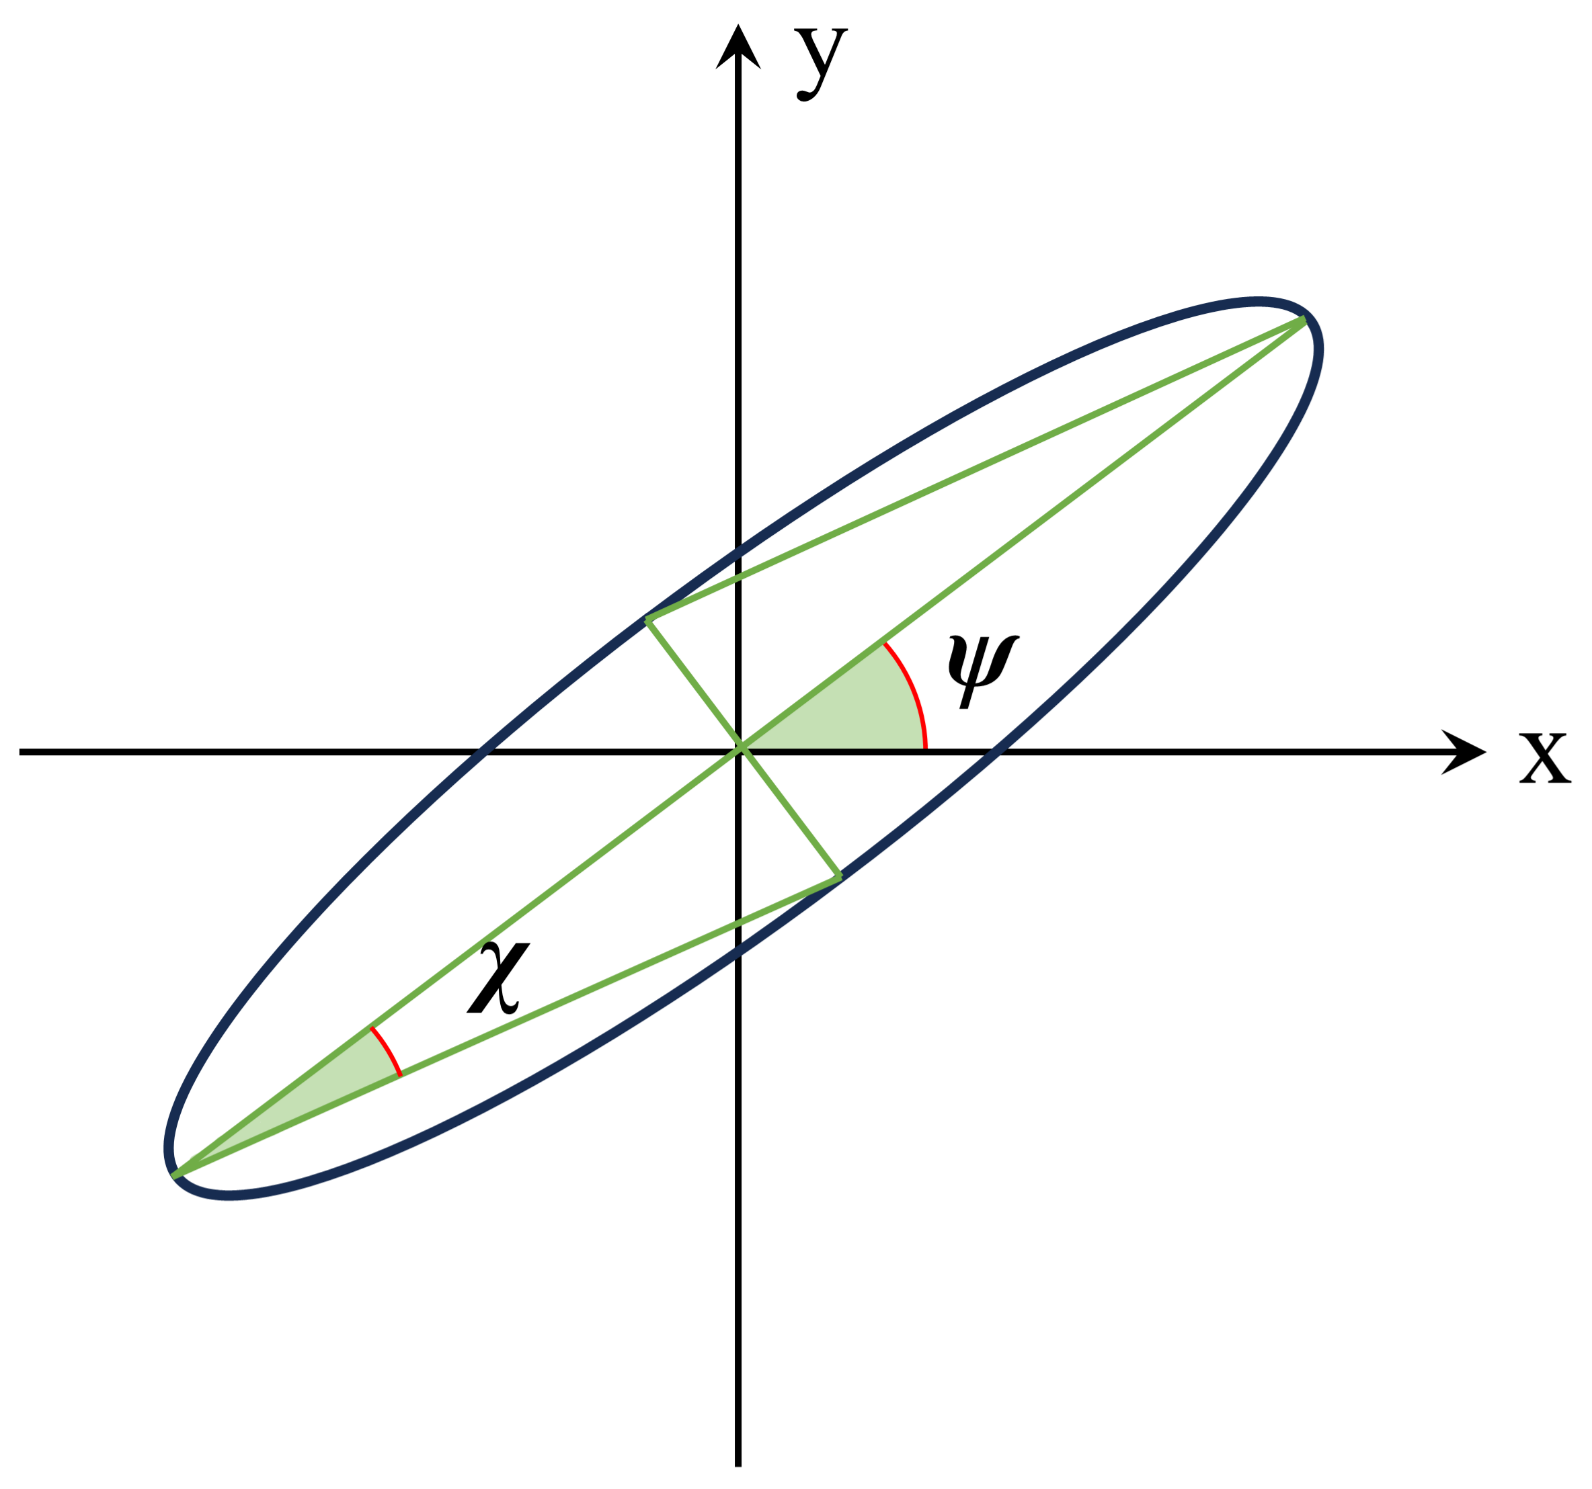


Based on the Jones matrix theory, we established a complete polarization state characterization system: the horizontal linear polarization state under crystal-free conditions and the elliptical polarization states corresponding to crystal rotations of 30, 60, and 90 ° are represented as Jones vectors *E0*, *E1*, *E2*, and *E3*, respectively, with their mathematical expressions as follows:

According to the above parameter relationships, the Jones matrix expressions corresponding to the three rotation angles (30, 60, and 90 °) can be derived as *J1, J2*, and *J3*
